# Supplementary material for: The Functional Haplotypes ofCHRM3Modulate mRNA Expression and Associate with Bladder Cancer among a Chinese Han Population in Kaohsiung City
Source: Hindawi journal article supplement (doi:10.1155/2016/4052846), 2016-01-01

## SUPPLEMENTARY DATA

Contains 1 table and 1 figure.

## SUPPLEMENTARY TABLE

**Supplementary Table1.** Summary of plants and population on different areas in Taiwan, 2012.

| Ranking | Area (City or County) | Number of plants<br>in operation | Population |
|---------|-----------------------|----------------------------------|------------|
| 1       | New Taipei City       | 18411                            | 3939305    |
| 2       | Taichung              | 15396                            | 2684893    |
| 3       | Taoyuan               | 10013                            | 2030161    |
| 4       | Tainan                | 8253                             | 1881645    |
| 5       | Changhua              | 8211                             | 1299868    |
| 6       | Kaohsiung             | 6306                             | 2778659    |
| 7       | Hsinchu               | 2897                             | 949064     |
| 8       | Chiayi                | 1991                             | 804943     |
| 9       | Miaoli                | 1629                             | 563976     |
| 10      | Yunlin                | 1517                             | 710991     |
| 11      | Taipei City           | 1158                             | 2673226    |
| 12      | Pingtung              | 952                              | 858441     |
| 13      | Yilan                 | 907                              | 458595     |
| 14      | Hualien               | 367                              | 335190     |
| 15      | Keelung City          | 246                              | 377153     |
| 16      | Taitung               | 189                              | 226252     |
| 17      | Penghu                | 100                              | 98843      |
| 18      | Kinmen                | 81                               | 113111     |
| 19      | Lianjiang             | 4                                | 11310      |

P.S : These data was downloaded from Environmental Protection  
Administration Executive Yuan, Taiwan  
(<http://erdb.epa.gov.tw/ERDBIndex.aspx> )

## SUPPLEMENTARY FIGURE LEGEND

**Figure S1. Sequencing results of CHRM3 SNPs.** PCR products obtained with specific primer pairs were separated by agarose gel electrophoresis and stained with ethidium bromide. PCR products amplified from different genotype carriers were then sequenced by Sanger sequencing assay to further confirm the SNP calling results.

## SUPPLEMENTARY FIGURE

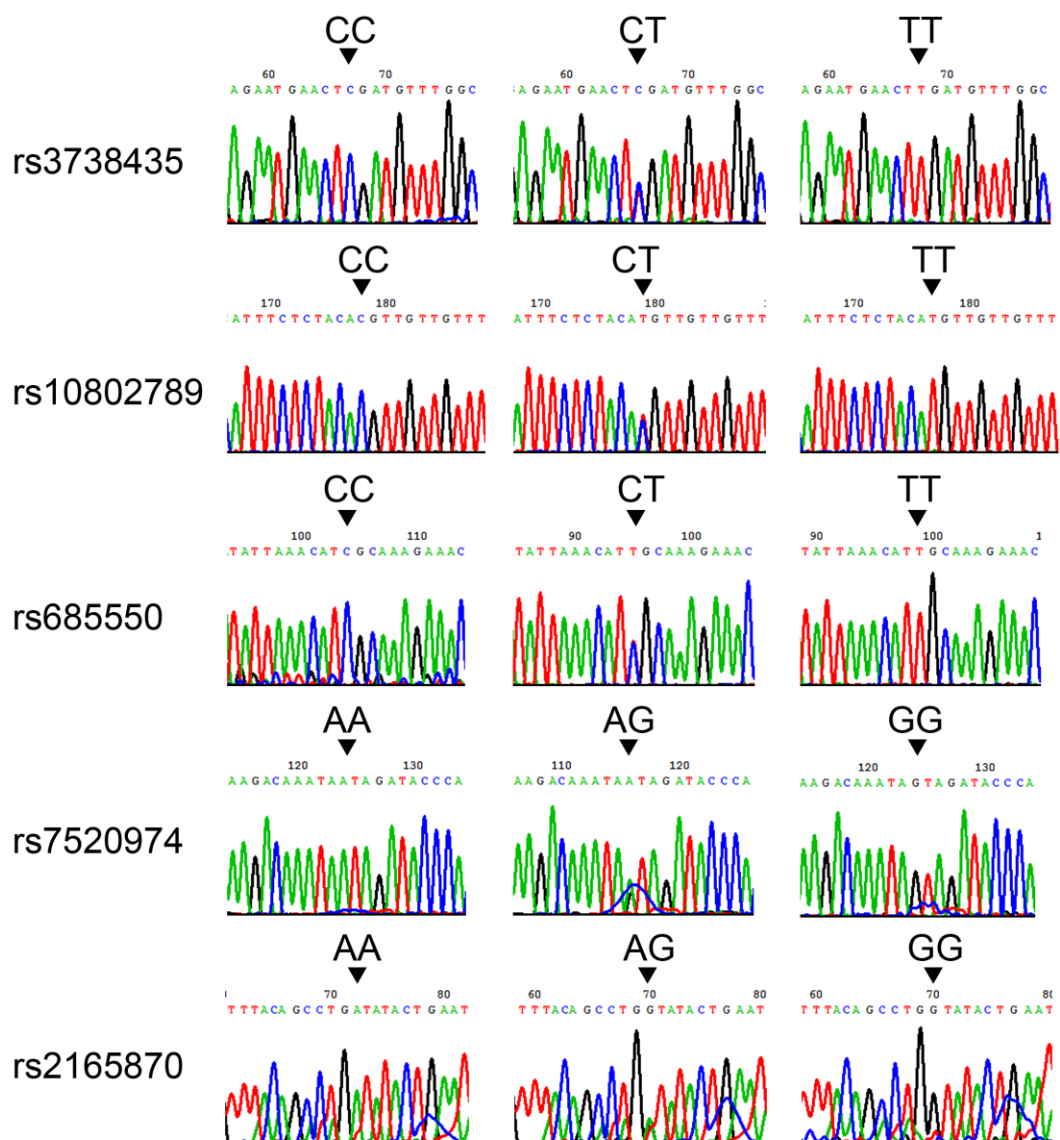

Supplement: f1 [file 4052846.f1.pdf]
